# Induction of $\beta$ -Cell Rest in Type 1 Diabetes

## Studies on the effects of octreotide and diazoxide

ELISABETH BJÖRK, MD, PHD  
CHRISTIAN BERNE, MD, PHD  
F. ANDERS KARLSSON, MD, PHD

**OBJECTIVE** — To evaluate the inhibitory effects of octreotide and diazoxide on insulin secretion in patients with type 1 diabetes and measurable levels of circulating C-peptide.

**RESEARCH DESIGN AND METHODS** — Diazoxide was given to six patients during a 7-day period (100 mg three times daily), followed by a 3-week washout. Subsequently, octreotide (50  $\mu$ g, three times daily) was administered subcutaneously for 7 days. Pre- and postprandial blood glucose and serum C-peptide concentrations were measured before medication (control) and on day 7 of each medication period. Glucagon-stimulated C-peptide was determined in the morning before medication and on the day after each treatment period.

**RESULTS** — Diazoxide inhibited glucagon-stimulated C-peptide secretion (mean increment 0.08 nmol/l vs. 0.18 nmol/l,  $P < 0.05$ ), whereas octreotide had no such effect. Both reduced the pre- and postprandial serum C-peptide concentrations ( $P < 0.05$ ), octreotide being the more potent in this respect. A reduction in basal and meal-related blood glucose was observed during octreotide treatment, whereas the glucose concentrations tended to be higher during treatment with diazoxide than during the 24-h control period.

**CONCLUSIONS** — The study indicates that the two drugs reduce insulin output by different mechanisms. Diazoxide inhibits hormonal release directly on the  $\beta$ -cells, whereas octreotide exerts its effect indirectly, presumably by multiple actions on insulin sensitivity and insulin-releasing hormones. The results suggest that each drug is capable of inducing  $\beta$ -cell rest in type 1 diabetes.

Hyperglycemia due to inadequate insulin secretion is a hallmark in the development of diabetes. The high glucose levels are thought to impair the secretory function of the insulin-producing  $\beta$ -cells (glucose toxicity) both in type 2 diabetes and in the early stages of type 1 diabetes (1,2). We have suggested that in autoimmune diabetes, hyperglycemia might increase the expression of islet cell autoantigens, thereby facilitating an autoimmune destruction of the islets. This suggestion is supported by results from experimental studies in which it has been shown that glucose (3–5) and insulin secretion (6) increase the production of islet cell autoantigens. In a recent clinical trial, we found that diazox-

ide, a  $K^+$ -channel opener that inhibits insulin secretion and reduces autoantigen expression in vitro (6) and in vivo (7), improved the residual  $\beta$ -cell function in patients with new-onset autoimmune diabetes (8). This indicates that  $\beta$ -cell rest might be beneficial to the course of type 1 diabetes (9). In a search for alternative drugs to reduce  $\beta$ -cell activity, we choose to examine the effect of octreotide.

Octreotide, a somatostatin analog, is widely used in clinical practice for its capacity to inhibit secretion from endocrine cells (10) and is most commonly used in the treatment of acromegaly. In such patients, glucose tolerance is improved (11) and insulin secretion decreased, effects partly

attributable to the growth hormone-lowering effects of the drug (12). It is known that somatostatin and its analogs also inhibit glucagon release (13). Furthermore, octreotide was recently found to increase insulin-stimulated glucose uptake directly in the perfused human forearm through local, yet undefined, mechanisms (14).

The purpose of the present study was to compare the effects of octreotide and diazoxide with respect to their ability to inhibit insulin secretion in subjects with type 1 diabetes.

### RESEARCH DESIGN AND METHODS

The study comprised six patients (three men and three women, mean age 27.25 years, range 22–31) with type 1 diabetes, diagnosed on clinical criteria. They had been treated with multiple insulin injections (regular insulin at mealtimes and NPH insulin at bedtime) for a mean of 4 years (range 1–10 years) and displayed some residual  $\beta$ -cell function, as evidenced by detectable levels of C-peptide.

At the start of the study, basal and glucagon-stimulated C-peptide concentrations were determined, and during 1 day, blood samples were taken before breakfast, lunch, and dinner and 45 min after each meal for blood glucose and serum C-peptide assays. Subsequently, the patients were admitted to the clinic and diazoxide (100 mg three times daily) was given orally for 1 week. On day 7, blood samples were taken before breakfast, lunch, and dinner and 45 min after each of these meals for glucose and C-peptide assays. Then, after an overnight fast, blood was collected for measurements of basal and glucagon-stimulated C-peptide concentrations. After a 3-week washout period, the patients were given octreotide as subcutaneous injections, 50  $\mu$ g three times daily before meals for 1 week. Blood sampling was carried out as described above. The following morning (day 8), 10–12 h after the last dose of octreotide, basal and glucagon-stimulated C-peptide concentrations were measured at 0 and 6 min after an intravenous injection of 0.5 mg glucagon. C-peptide (reference range in the fasting state 0.25–1.0 nmol/l)

From the Department of Medicine, University Hospital, Uppsala, Sweden.

Address correspondence and reprint requests to Anders Karlsson, Section of Endocrinology and Diabetes, Department of Medicine, University Hospital, S-751 85 Uppsala, Sweden. E-mail: anders.karlsson@medicin.uu.se.

Received for publication 18 July 1997 and accepted in revised form 12 November 1997.

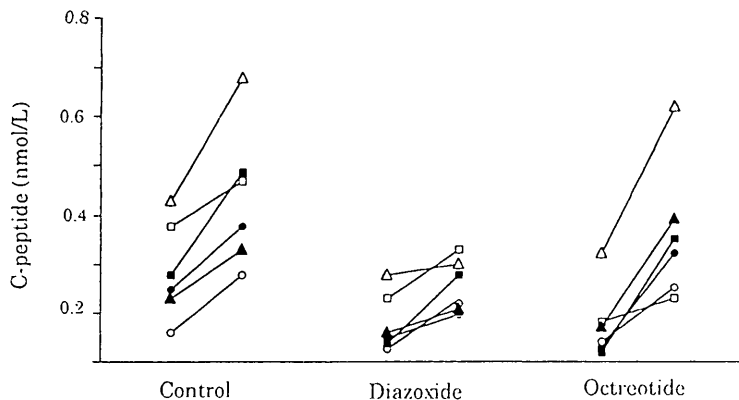

**Figure 1**—Basal and glucagon-stimulated C-peptide concentrations in six patients with type 1 diabetes and residual insulin secretion, determined at the start of the study (control), after 1 week of diazoxide medication (100 mg three times daily), and after 1 week of medication with octreotide (150  $\mu$ g daily). See METHODS for details. The multiple symbols represent individual patients.

was determined with a radioimmunoassay in use at the Department of Clinical Chemistry, University Hospital, Uppsala, Sweden. HbA<sub>1c</sub> (reference range 3.8–5.2%) was measured before the study and on day 7 during each treatment period. Throughout the study, the patients were instructed to adjust their insulin doses in accordance with the self-monitored blood glucose.

### Statistics

The data, given as means  $\pm$  SE, were analyzed by the paired *t* test and by factorial and repeated measures analysis of variance.

## RESULTS

### Glucagon-stimulated insulin secretion

At the start of the study, all patients had detectable C-peptide levels, which increased after injection of glucagon (from  $0.28 \pm 0.04$  to  $0.43 \pm 0.06$  nmol/L;  $P < 0.0024$ ). After 7 days of diazoxide medication, the basal C-peptide concentrations was lower and the response to glucagon was reduced (from  $0.17 \pm 0.02$  to  $0.25 \pm 0.02$  nmol/L;  $P < 0.0081$ ) compared with the response before treatment ( $P < 0.05$ ). The basal C-peptide concentration was also lowered after 1 week of treatment with octreotide. However, the glucagon-stimulated response at the end of that period was similar to that seen at the start of the study (increase in C-peptide from  $0.18 \pm 0.03$  to  $0.36 \pm 0.06$  nmol/L;  $P < 0.0038$ ) (Fig. 1).

### Meal-stimulated insulin secretion and blood glucose concentrations

The effects of medication with diazoxide and octreotide on pre- and postprandial C-

peptide levels are illustrated in Fig. 2. Both drugs lowered the insulin secretion compared with the control value ( $P < 0.05$ ), and octreotide was more potent than diazoxide throughout the day. Blood glucose tended to be higher during the diazoxide treatment than before treatment, whereas during octreotide medication, lower blood glucose values were found. In particular, the postprandial glucose levels during the octreotide period were lower than those during the control and diazoxide periods (Fig. 3).

Before entering the study, the patients displayed a mean HbA<sub>1c</sub> of  $5.4 \pm 0.7\%$ , and their mean dose of exogenous insulin taken was  $0.39 \pm 0.04$  IU  $\cdot$  kg<sup>-1</sup>  $\cdot$  day<sup>-1</sup>. These values did not change significantly after 1 week of treatment with diazoxide ( $5.3 \pm$

$0.6\%$  and  $0.40 \pm 0.03$  IU  $\cdot$  kg<sup>-1</sup>  $\cdot$  day<sup>-1</sup>, respectively) or octreotide ( $5.0 \pm 0.4\%$  and  $0.43 \pm 0.03$  IU  $\cdot$  kg<sup>-1</sup>  $\cdot$  day<sup>-1</sup>, respectively). Mean BMI was  $24.8 \pm 0.8$  kg/m<sup>2</sup> before the study and raised during medication with diazoxide, probably due to fluid retention ( $25.6 \pm 0.75$  kg/m<sup>2</sup>,  $P < 0.05$ ), whereas no significant difference was observed after octreotide treatment ( $24.6 \pm 0.8$  kg/m<sup>2</sup>).

**CONCLUSIONS** — In this study, diazoxide markedly inhibited glucagon-stimulated insulin release, whereas octreotide had virtually no effect. By contrast, the meal-stimulated C-peptide levels were more reduced by octreotide than by diazoxide. Octreotide also lowered the 24-h glucose concentration compared with the control value, whereas diazoxide did not.

Diazoxide is known to act on the insulin-producing  $\beta$ -cells by opening ATP-sensitive K<sup>+</sup>-channels (15) and thereby directly inhibiting insulin release. This effect is used in the treatment of patients with hypoglycemia and abnormal insulin production, e.g., in insulinoma (16) and nesidioblastosis (17). In addition to its effects on the  $\beta$ -cells, diazoxide also has extrapancreatic effects (e.g., on vascular K<sup>+</sup>-channels), as illustrated by its ability to lower the blood pressure upon intravenous administration (18). Further, edema and increased hair growth are common side effects of continuous oral treatment with diazoxide. This might reflect actions of the drug on ATP-sensitive K<sup>+</sup>-channels in other tissues (19), although this has not been clarified.

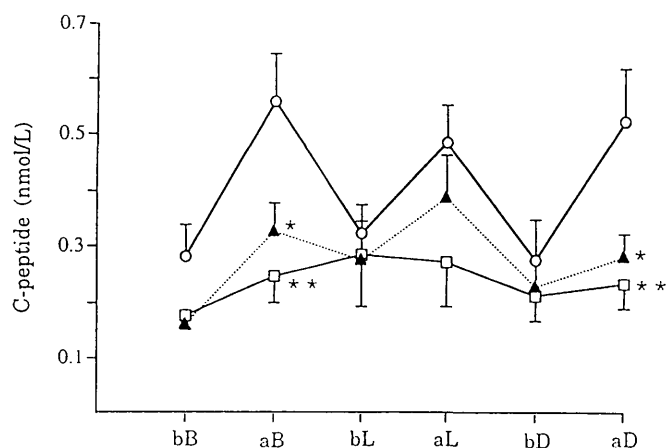

**Figure 2**—Pre- and postprandial C-peptide concentrations in six patients with type 1 diabetes, determined at the start of the study (basal), after 1 week of diazoxide medication (100 mg three times daily), and after 1 week of octreotide medication (150  $\mu$ g daily).  $\circ$ , control group;  $\blacktriangle$ , diazoxide group;  $\square$ , octreotide group. See METHODS for details. \* $P < 0.05$  compared with the basal value. \*\* $P < 0.01$  compared with the basal value. bB, aB = before and after breakfast; bL, aL = before and after lunch; bD, aD = before and after dinner.

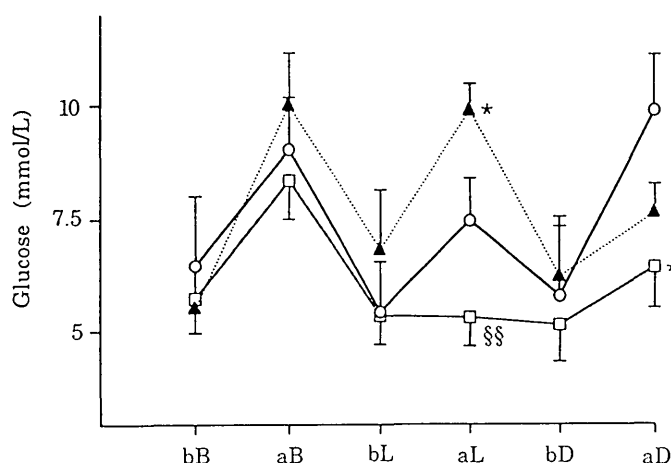

**Figure 3**—Pre- and postprandial blood glucose concentrations in six patients with type 1 diabetes, determined at the start of the study (basal), after 1 week of diazoxide medication (100 mg three times daily), and after 1 week of octreotide medication (150 µg daily). ○, control group; ▲, diazoxide group; □, octreotide group. See METHODS for details. \* $P < 0.05$  compared with the basal value. \*\* $P < 0.01$  compared with the basal value. §§ $P < 0.01$  octreotide compared with diazoxide period. bB, aB = before and after breakfast; bL, aL = before and after lunch; bD, aD = before and after dinner.

Diazoxide treatment has met with variable success in patients with nesidioblastosis, whereas octreotide may lower insulin output in these cases as well (20). The basic defect in nesidioblastosis has recently been identified as mutations in either of the two subunits of the ATP-sensitive  $K^+$ -channel (21–23), which discovery has shed new light on the cause of the differential response to diazoxide and octreotide.

In the present study, octreotide had virtually no effect on glucagon-stimulated insulin release. On the other hand, the octreotide regimen was associated with a significant reduction of diurnal glucose and insulin levels, suggesting that the effects of octreotide are exerted at another level than through a direct inhibitory action on insulin release from the  $\beta$ -cells. This notion is supported by studies in the perfused rat pancreas, where octreotide had little or no effect in reducing insulin secretion (24). In healthy individuals, octreotide has been found to inhibit postprandial hyperglycemia and to lower insulin levels (25). Also, in patients with diabetes, both type 1 and type 2, octreotide lowers the hyperglycemia after meals (26,27) and frequently reduces the insulin requirement (28). Taken together, our own results and data from others suggest that octreotide may reduce glucose and insulin concentration by its inhibitory action on glucose counterregulatory hormones (29). Alternatively, inhibition of gut hormones with incretin effects or a decrease in gastric motility may also determine the glycemic and insulin excur-

sions after meals (24,30).

In addition, octreotide has been reported to increase insulin sensitivity (31–35) and to enhance glucose uptake in skeletal muscle (13). In a study of Zucker rats, improved insulin sensitivity has been observed after treatment with diazoxide (36). In the present study, however, a decrease in C-peptide levels during diazoxide treatment was accompanied by increased glucose concentrations, suggesting that in these patients the drug had no effect on insulin sensitivity.

In summary, the results indicate that both diazoxide and octreotide are capable of inducing  $\beta$ -cell rest. In a recent study we found that a 3-month period of supplementary treatment with diazoxide was capable of improving the endogenous production of insulin in patients with new-onset autoimmune diabetes (8). Based on the present findings, trials of octreotide in this respect would seem of value, as well as studies to determine whether the two drugs can be of additive or synergistic value.

**Acknowledgments**— This study was supported by grants from the Medical Research Council, the Torsten och Ragnar Söderbergh Foundations, and the Family Ernfrors Fund.

## References

- Rossetti L, Giaccari A, DeFronzo RA: Glucose toxicity. *Diabetes Care* 13:610–630, 1990
- Jansson L, Eizirik DL, Pipeleers DG, Borg

- LAH, Hellerström C, Andersson A: Impairment of glucose-induced insulin secretion in human pancreatic islets transplanted to diabetic nude mice. *J Clin Invest* 96:721–726, 1995
- Kämpe O, Andersson A, Björk E, Hallberg A, Karlsson FA: High-glucose stimulation of 64,000-M<sub>2</sub> islet cell autoantigen expression. *Diabetes* 38:1326–1328, 1989
- Hagopian WA, Karlsen AE, Petersen JS, Teague J, Gervasi A, Jiang J, Fujimoto W, Lernmark A: Regulation of glutamic acid decarboxylase diabetes autoantigen expression in highly purified isolated islets from *Macaca nemestrina*. *Endocrinology* 132:2674–2681, 1993
- Björk E, Kämpe O, Karlsson FA, Pipeleers DG, Andersson A, Hellerström C, Eizirik DL: Glucose regulation of the autoantigen GAD<sub>65</sub> in human pancreatic islets. *J Clin Endocrinol Metab* 75:1574–1576, 1992
- Björk E, Kämpe O, Andersson A, Karlsson FA: Expression of the 64 kDa/glutamic acid decarboxylase rat islet cell autoantigen is influenced by the rate of insulin secretion. *Diabetologia* 32:490–493, 1992
- Björk E, Kämpe O, Grawé J, Hallberg A, Norheim I, Karlsson FA: Modulation of beta-cell activity and its influence on islet cell antibody (ICA) and islet cell surface antibody (ICSA) reactivity. *Autoimmunity* 16:181–188, 1993
- Björk E, Berne C, Kämpe O, Wibell L, Oskarsson P, Karlsson FA: Diazoxide treatment at onset preserves residual insulin secretion in adults with autoimmune diabetes. *Diabetes* 45:1427–1430, 1996
- Karlsson FA, Björk E: Beta-cell rest: a strategy for the prevention of autoimmune diabetes. *Autoimmunity* 26:117–122, 1997
- Lamberts SWJ, Van Der Lely A-J, De Herder WW, Hofland LJ: Octreotide. *N Engl J Med* 334:246–254, 1996
- Acromegaly Therapy Consensus Development Panel: Benefits versus risks of medical therapy for acromegaly. *Am J Med* 97:468–473, 1994
- Plewe G, Beyer J, Krause U, Neufeld M, Del Pozo E: Long-acting and selective suppression of growth hormone secretion by somatostatin analogue SMS201–995 in acromegaly. *Lancet* ii:782–784, 1984
- Gama R, Marks V, Wright J, Teale JD: Octreotide exacerbated fasting hypoglycemia in a patient with a proinsulinoma: the glucostatic importance of pancreatic glucagon. *Clin Endocrinol* 43:117–120, 1995
- Möller N, Bagger JP, Schmitz O, Jørgensen JO, Ovesen P, Möller J, Alberti KG, Orskov H: Somatostatin enhances insulin-stimulated glucose uptake in the perfused human forearm. *J Clin Endocrinol Metab* 80:1789–1793, 1995
- Petit P, Loubatières-Mariani MM: Potassium channels of the insulin-secreting B cell.

- Fundam Clin Pharmacol* 6:123–134, 1992
16. Goode PN, Farndon JR, Anderson J, Johnston ID, Morte JA: Diazoxide in the management of patients with insulinoma. *World J Surg* 10:586–592, 1986
17. Grant DB, Dunger DB, Burns EC: Long-term treatment with diazoxide in childhood hyperinsulinism. *Acta Endocrinol* 113:340–345, 1986
18. Richer C, Pratz J, Mulder P, Mondot S, Giudicelli JF, Caverio I: Cardiovascular and biological effects of K<sup>+</sup> channel openers, a class of drugs with vasorelaxant and cardioprotective properties. *Life Sci* 47:1693–1705, 1990
19. Catterall W, Epstein PN: Ion channels. *Diabetologia* 35 (Suppl. 2):S23–S33, 1992
20. Thornton PS, Alter CA, Katz LE, Baker L, Stanley CA: Short- and long-term use of octreotide in the treatment of congenital hyperinsulinism. *J Pediatr* 123:637–643, 1993
21. Permutt MA, Nestorowicz A, Glaser B: Familial hyperinsulinism: an inherited disorder of spontaneous hypoglycemia in neonates and infants. *Diabetes Rev* 4:347–355, 1996
22. Thomas P, Ye Y, Lightner E: Mutation of the pancreatic islet inward rectifier Kir6.2 also leads to familial persistent hyperinsulinemic hypoglycemia of infancy. *Hum Mol Genet* 5:1809–1812, 1996
23. Dunne MJ, Kane C, Shepherd RM, Sanchez JA, James RF, Johnson PR, Aynsley-Green A, Lu S, Clement JP, Lindley KJ, Seino S, Aguilar-Bryan L: Familial persistent hyperinsulinemic hypoglycemia of infancy and mutations in the sulfonylurea receptor. *N Engl J Med* 336:703–706, 1997
24. Verchere CB, Kwok YN, Brown JC: Inhibitory actions of a somatostatin analog SMS 201–995 on endocrine secretion from the isolated perfused stomach and pancreas of the rat. *Pharmacology* 46:50–60, 1993
25. Davies RR, Miller M, Turner SJ, Goodship TH, Cook DB, Watson M, McGill A, Orskov H, Alberti KG, Johnston DG: Effects of somatostatin analogue SMS 201–995 in normal man. *Clin Endocrinol (Oxf)* 24:665–674, 1986
26. Spinas GA, Bock A, Keller U: Reduced postprandial hyperglycemia after subcutaneous injection of a somatostatin-analogue (SMS 201–995) in insulin-dependent diabetes mellitus. *Diabetes Care* 8:429–435, 1985
27. Candrina R, Guistina G: Effect of a new long-acting somatostatin analogue (SMS 201–995) on glycemic and hormonal profiles in insulin-treated type II diabetic patients. *J Endocrinol Invest* 11:501–507, 1988
28. Serrano Rios M, Navascues I, Saban J, Ordonez A, Sevilla F, Del Pozo E: Somatostatin analog SMS 201–995 and insulin needs in insulin-dependent diabetic patients studied by means of an artificial pancreas. *J Clin Endocrinol Metab* 63:1071–1074, 1986
29. Ezzat S, Melmed S: Endocrine applications of the somatostatin analogue octreotide (Sandostatin). *Metabolism* 41:34–38, 1992
30. Camilleri M: Effects of somatostatin analogues on human gastrointestinal motility. *Digestion* 57 (Suppl. 1):90–92, 1996
31. Bergman RN, Ader M, Finegood DT, Pacini G: Extrapankreatic effect of somatostatin infusion to increase glucose clearance. *Am J Physiol* 47:E370–E379, 1984
32. Wu MS, Ho LT, Chen JJ, Reaven GM: Somatostatin potentiation of insulin-induced glucose uptake in normal individuals. *Am J Physiol* 251:E674–E679, 1984
33. Stevenson RW, Steiner KE, Hendrick GK, Cherrington AD: Effect of somatostatin on glucose homeostasis in conscious long-fasted dogs. *Am J Physiol* 253:E435–E442, 1987
34. Hendrick GK, Frizzell RT, Cherrington AD: Effect of somatostatin on nonesterified fatty acid levels modifies glucose homeostasis during fasting. *Am J Physiol* 253:E443–E452, 1987
35. Meneilly GS, Elahi D, Minaker KL, Rowe JW: Somatostatin enhances insulin-mediated glucose disposal in the elderly. *J Clin Endocrinol Metab* 67:407–410, 1988
36. Alemzadeh R, Slonim AE, Zdanowicz MM, Maturo J: Modification of insulin resistance by diazoxide in obese Zucker rats. *Endocrinology* 133:705–712, 1993
